# Supplementary material for: Facile, efficient, and environmentally friendly α- and aromatic regioselective chlorination of toluene using KHSO5 and KCl under catalyst-free conditions
Source: Royal Society of Chemistry journal article supplement (doi:10.1039/c5nj00118h), 2015-01-01
Supplement: c5nj00118h1.pdf [file c5nj00118h1.pdf]

Supplementary Material (ESI) for New Journal of Chemistry

**Facile, Efficient, and Environmentally Friendly  $\alpha$ - and Aromatic Regioselective Chlorination of Toluene using  $\text{KHSO}_5$  and  $\text{KCl}$  under Catalyst-free Conditions**

Yasemin Çimen,\* Seçkin Akyüz and Hayrettin Türk

**GC chromatograms**

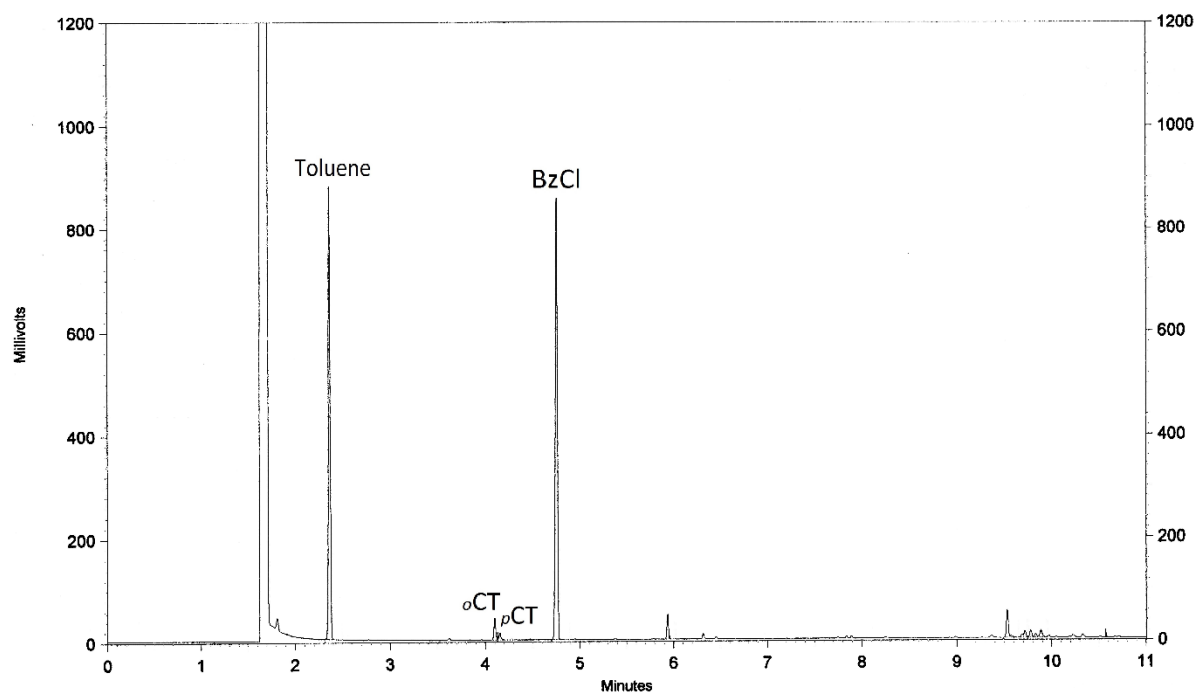

The GLC chromatogram of the reaction mixture of the chlorination of toluene using  $\text{KHSO}_5$  and  $\text{KCl}$  in the  $\text{CH}_2\text{Cl}_2$ - $\text{H}_2\text{O}$  solvent mixture.

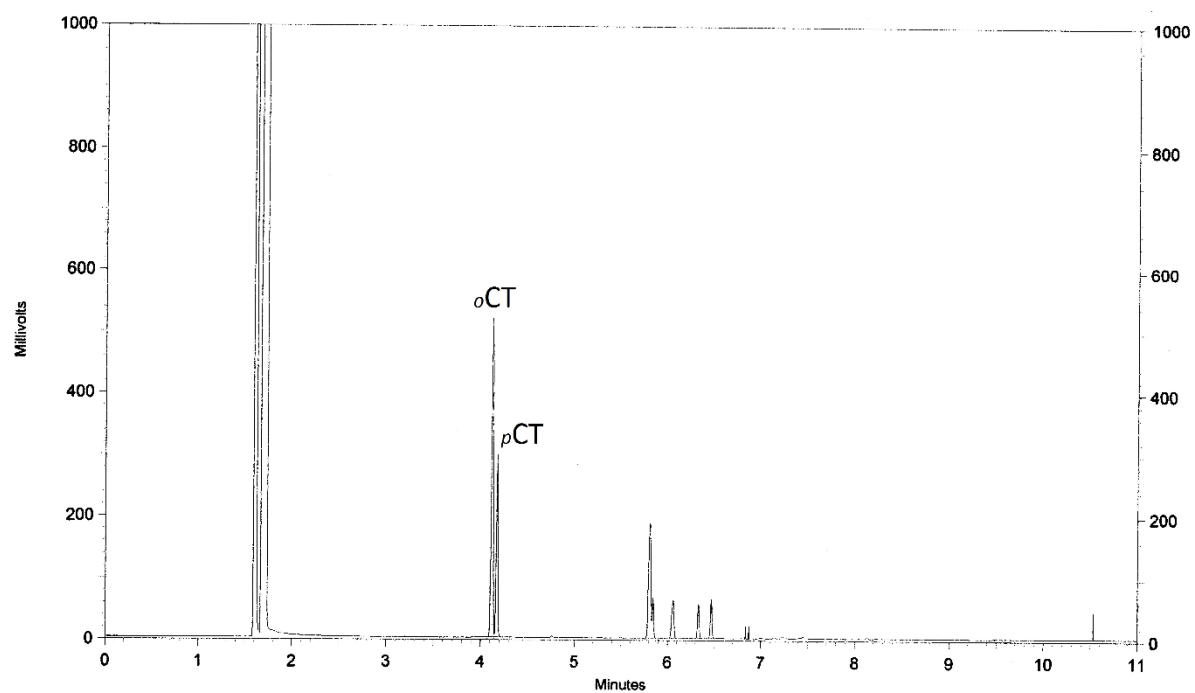

The GLC chromatogram of the reaction mixture of the chlorination of toluene using  $\text{KHSO}_5$  and  $\text{KCl}$  in the  $\text{CH}_3\text{OH}-\text{H}_2\text{O}$  solvent mixture.
